# Supplementary material
Source: PubMed Central journal article supplement (PMC3469326)
Supplement: NIHMS409964-supplement-1.pdf [file NIHMS409964-supplement-1.pdf]

## SUPPLEMENTARY ONLINE DATA

# Differentiation of propeptide residues regulating the compartmentalization, maturation and activity of the broad-range phospholipase C of *Listeria monocytogenes*

Emily R. SLEPKOV, Alan PAVINSKI BITAR and H el ene MARQUIS<sup>1</sup>

Department of Microbiology and Immunology, Cornell University, Ithaca, NY 14853, U.S.A.

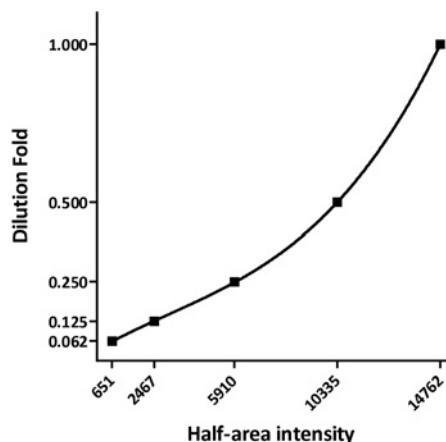

**Figure S1 Regression curve of band intensity in function of protein concentration**

PC-PLC was immunoprecipitated from pulse-labelled infected cells and 2-fold serial dilutions were resolved by SDS/PAGE. The autoradiograph was scanned with Image J. The half-area intensity was calculated for each lane and plotted as a function of the protein dilution fold. The curve follows a third-level exponential scale and the derived equation ( $y = [2.897 \times 10^{-13}]x^3 - [2.68 \times 10^{-9}]x^2 + [4.176 \times 10^{-5}]x + 0.03561$ ) was used to normalize the experimental results obtained with the wild-type strain and the mutants.

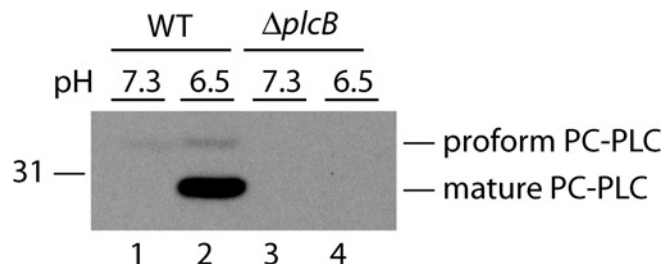

**Figure S2 Compartmentalization and maturation of PC-PLC is regulated by pH in human epithelial HeLa cells**

Infected HeLa cells were pulse-labelled with [<sup>35</sup>S]methionine/cysteine, and bacterial protein synthesis was inhibited by the addition of chloramphenicol before chasing in nigericin-supplemented buffer at pH 7.3 or 6.5. Secreted PC-PLC was immunoprecipitated from host-cell lysates and detected by autoradiography. The position of a molecular-mass marker in kDa is indicated on the far left-hand side. Positions of the proform and mature form of PC-PLC are indicated on the far right-hand side. Lanes 1 and 2, cells were infected with strain HEL-1031 expressing wild-type (WT) PC-PLC; lanes 3 and 4, cells were infected with strain DP-L1935, which has a deletion in the gene encoding PC-PLC (ΔplcB).

<sup>1</sup> To whom correspondence should be addressed (email hm72@cornell.edu).

**Table S1 Sequences of DNA oligonucleotide primers used in the present study**

The underlined sequences represent XhoI and PstI restriction sites in Marq 512 and Marq 515 respectively.

| Primer   | Sequence (5'→3')                                   |
|----------|----------------------------------------------------|
| Marq 512 | CCCTCGAGTTAACAAATGTTAGAGAAAAATTAATTCT              |
| Marq 513 | CGTATCACGAGGAGGGAGTAAAGTGAATGATGAAATTCAAAAATGTG    |
| Marq 514 | CACATTTTGAATTCATATCATTCACTTATACTCCCTCCTCGTGATACG   |
| Marq 515 | GGGCTGCAGTAAATATATCCACCCGCTAACGA                   |
| Marq 516 | GTAACGATAAAAGCAAATGCCGAGCTGCTGAATACTTACAAACACCCGC  |
| Marq 517 | GCGGGTGTGTAAGTATTCAGCAGCTGCCGATTGCTTTTATCGTTAC     |
| Marq 518 | GCAAATGCCTGTTGTGATGCAGCTGCACAACACCCGAGCTCC         |
| Marq 519 | GGAGCTGCCGGTGTGTTGTGAGCTGCATCACAACAGGCATTGTC       |
| Marq 520 | GATGAATACTAGCCGAGCCGAGCTCCGC                       |
| Marq 521 | GCGGAGCTGCCGCTGCCGTAAGTATTCATC                     |
| Marq 522 | CGGTAACGATAAAAGCAAATGCCATGATATTGACAGCAAATTACCTC    |
| Marq 523 | GAGGTAATTTGCTGTCAATATCATGGGCATTGCTTTTATCGTTACCG    |
| Marq 524 | TTACAAACACCCGAGCTCCTCATAAAGCTAGTTGGTCCGCGG         |
| Marq 525 | CCGCGGACCAACTAAGTTTATGAGGAGCTGCCGGTGTGTTGTA        |
| Marq 526 | CTTACAACACCCGAGCTGCCGCTGCTATTGACAGCAAATTACC        |
| Marq 527 | GGTAATTTGCTGTCAATAGCAGCCGAGCTGCCGGTGTGTTGTAAG      |
| Marq 528 | CTTACAACACCCCAACAACCGCATGATATTG                    |
| Marq 529 | CAATATCATGCGGTTGTTGGGGTGTGTTGTAAG                  |
| Marq 530 | AGCTCCGCATGATGCTGCCCAAAATTACCACAT                  |
| Marq 531 | ATGTGGTAATTTGGCGGCAGCATCATGCGGAGCT                 |
| Marq 532 | TGATATTGACAGCGCAGCAGCACATAAAGCTAG                  |
| Marq 533 | CTAAGTTTATGTGCTGCTGCCGTGTCAATATCA                  |
| Marq 534 | CAGCAAATTACCAGCTGCCTTAGTTGGTCC                     |
| Marq 535 | GGACCAACTAAGTGCAGCTGGTAATTTGCTG                    |
| Marq 536 | ATTACCACATAAAGCTGCTTGGTCCGCGGATA                   |
| Marq 537 | TTATCCGCTGACCAAGCAGCTTTATGTGGTAAT                  |
| Marq 538 | GATGAATACTAAAACACCCGAGCTC                          |
| Marq 539 | GAGCTGCCGGTGTGTTTAAAGTATTCATC                      |
| Marq 549 | CGGTAACGATAAAAGCAAATGCCAAACACCCGAGCTCCGCAT         |
| Marq 550 | ATGCGGAGCTGCCGGTGTGTTGGGCATTGCTTTTATCGTTACCG       |
| Marq 551 | AAATGCCTGTTGTGATGAATACTTACATGATATTGACAGCAAATTACCAC |
| Marq 552 | GTGGTAATTTGCTGTCAATATCATGTAAGTATTCATCACAACAGGCATT  |
| Marq 553 | GATAAAAGCAAATGCCTGTTGTGATGCAGCTCCGCATGATATTGACA    |
| Marq 554 | TGTCAATATCATGCCGAGCTGCATCACAACAGGCATTGCTTTTATC     |
| Marq 555 | ATGCCTGTTGTGCTGCATACTTACAAC                        |
| Marq 556 | GTTTGAAGTATGCAGCACAACAGGCAT                        |
| Marq 570 | CGGTAACGATAAAAGCAAATGCCCGCAGCTCCGCATGATATT         |
| Marq 571 | AATATCATGCCGAGCTGCCGGGGCATTGCTTTTATCGTTACCG        |
| Marq 572 | CGGTAACGATAAAAGCAAATGCCCTCCGCATGATATTGACAGCA       |
| Marq 573 | TGCTGTCAATATCATGCCGAGCGGCATTGCTTTTATCGTTACCG       |
| Marq 574 | GATGAATACTTACAACACCCGCACTTAGTTGGTCCGCGGATAACC      |
| Marq 575 | GGTTATCCGCGGACCAACTAAGTGCGGGTGTTGTAAGTATTCATC      |
| Marq 576 | CGGTAACGATAAAAGCAAATGCCATTGACAGCAAATTACCACATAAAC   |
| Marq 577 | GTTTATGTGGTAATTTGCTGTCAATGGCATTGCTTTTATCGTTACCG    |
| Marq 578 | CGGTAACGATAAAAGCAAATGCCAGCAAATTACCACATAAAGCTAGTTG  |
| Marq 579 | CAACTAAGTTTATGTGGTAATTTGCTGGCATTGCTTTTATCGTTACCG   |
| Marq 580 | CGGTAACGATAAAAGCAAATGCCTTACCACATAAAGCTAGTTGGTCC    |
| Marq 581 | GGACCAACTAAGTTTATGTGGTAAGGCATTGCTTTTATCGTTACCG     |
| Marq 582 | CGGTAACGATAAAAGCAAATGCCTGGTCCGCGGATAACCCGAC        |
| Marq 583 | GTCGGGTTATCCGCGGACAGGCATTGCTTTTATCGTTACCG          |
| Marq 595 | ATAAAGCAAATGCCTGTTGTGATGCATACTTACAACACCCGAGCTC     |
| Marq 596 | GAGCTGCCGGTGTGTTGTAAGTATGCATCACAACAGGCATTGCTTTTAT  |
| Marq 597 | TGCTGTCAATATCATGCCGAGCGGCATTGCTTTTATCGTTACCG       |
| Marq 598 | GATGAATACTTACAACACCCGCACTTAGTTGGTCCGCGGATAACC      |
| Marq 599 | GGTTATCCGCGGACCAACTAAGTGCGGGTGTTGTAAGTATTCATC      |
| Marq 600 | CGGTAACGATAAAAGCAAATGCCATTGACAGCAAATTACCACATAAAC   |
| Marq 601 | GTTTATGTGGTAATTTGCTGTCAATGGCATTGCTTTTATCGTTACCG    |
| Marq 602 | CGGTAACGATAAAAGCAAATGCCAGCAAATTACCACATAAAGCTAGTTG  |

Table S1 Continued

| Primer   | Sequence (5' → 3')                               |
|----------|--------------------------------------------------|
| Marq 603 | GCAAATGCCTGTTGTGATGAATACGCACAAACACCCGCAGCTCCGCAT |
| Marq 604 | ATGCCGGAGCTGCCGGTGTGGTGCATTCACAAACAGGCATTTGC     |
| Marq 609 | CGGTAACGATAAAAGCAAATGCCAAACTTAGTTGGTCCGCGGATAA   |
| Marq 610 | TTATCCGCGGACCAACTAAGTTGGCATTGCTTTTATCGTTACCG     |
| Marq 611 | CGGTAACGATAAAAGCAAATGCCAGTTGGTCCGCGGATAACCCG     |
| Marq 612 | CGGGTTATCCGCGGACCAACTGGCATTGCTTTTATCGTTACCG      |

Received 13 April 2010/27 September 2010; accepted 29 September 2010  
Published as BJ Immediate Publication 29 September 2010, doi:10.1042/BJ20100557
